# Supplementary material for: Synthesis and optoelectronic properties of a heterobimetallic Pt(ii)–Ir(iii) complex used as a single-component emitter in white PLEDs
Source: Royal Society of Chemistry journal article supplement (doi:10.1039/c2dt12027e), 2012-01-01

**Synthesis and Optoelectronic Properties of Heterobimetallic Cyclo-  
metalated Pt(II)-Ir(III) Complex Used As Single-Component  
Emitter in the White PLEDs**

Xiaoshuang Li, Yu Liu, Jian Luo, Zhiyong Zhang, Danyan Shi, Qing Chen, Yafei  
Wang\*, Juan He, Jianming Li, Gangtie Lei, Weiguo Zhu\*

*College of Chemistry, Key Lab of Environment-Friendly Chemistry and Application in  
Ministry of Education, Xiangtan University, Xiangtan 411105, China*

Corresponding author: Dr. Weiguo Zhu and Yafei Wang

Tel: +86-731-58298280

Fax: +86-731-58292251

E-mail: [zhuwg18@126.com](mailto:zhuwg18@126.com) and [qij8304@hotmail.com](mailto:qij8304@hotmail.com)

## Supporting Information

Figure S1 PL spectra of FIr(pic), FPt(pic), FIr(pic)-C6DBC6-(pic)PtF and the mixture of FIr(pic) + FPt(pic) in dilute DCM

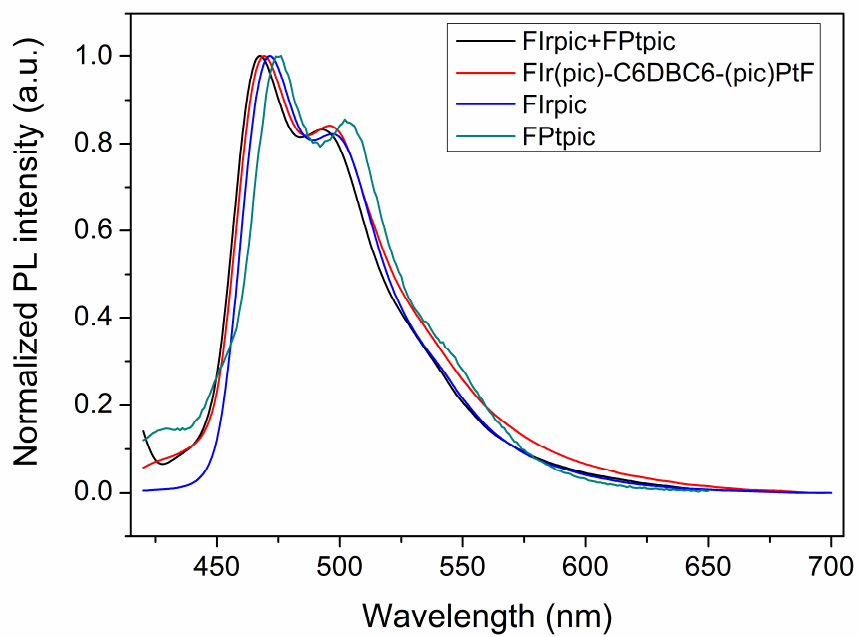

Supplement: c2dt12027e.pdf [file c2dt12027e.pdf]
